# Supplementary material
Source: Springer Nature journal article supplement (https://www.springermedizin.de/resource/supplementary/12913_2013_3561_MOESM11_ESM.pdf/9533226)
Supplement: MOESM11 [file 9533226]

## **Governance Mechanisms**

Shared governance  
Magnet accreditation  
Professional development  
Clinical governance  
Organization of healthcare delivery  
Funding schemes (*described elsewhere*)

## **Enablers of transformation**

Engagement  
Communication  
Leadership  
Clear vision  
Change management strategies  
More research needed on enablers

## **Workforce outcomes**

(e.g., work attitudes, collaborative practice,  
professional behaviour)

**Patient  
outcomes**

**Financial  
outcomes**
